# Supplementary material
Source: MDPI journal article supplement (https://www.mdpi.com/2073-4395/13/4/1097)
Supplement: s1 [file s1]

# Suitability of volcanic ash, rice husk ash, green compost and biochar as amendments for a Mediterranean alkaline soil.

José M. de la Rosa<sup>1</sup>, Sara M. Pérez-Dalí<sup>1</sup>, Paloma Campos<sup>2</sup>, Águeda Sánchez-Martín<sup>1</sup>, José A. González-Pérez<sup>1</sup>, Ana Z. Miller<sup>1</sup>

<sup>1</sup> Instituto de Recursos Naturales y Agrobiología de Sevilla, Consejo Superior de Investigaciones Científicas (IRNAS-CSIC), Avenida Reina Mercedes 10, 41012 Sevilla, Spain

<sup>2</sup> Facultad de Química, Universidad de Sevilla, C/ Profesor García González, 1, 41012 Sevilla, Spain

\* Correspondence: [jmrosa@irnase.csic.es](mailto:jmrosa@irnase.csic.es)

**Supplementary Table S1.** Comparative thermogravimetry (TG) parameters in samples summarizing: Total weight loss for the temperature interval 50–850 °C (% ± 1%), weight losses and relative weight losses for the temperature intervals, 50–175 °C, 175–400 °C, 400–625 °C and 625–850 °C.

|                                 | Temperature range | C    | WB   | GC   | RA   | VA |
|---------------------------------|-------------------|------|------|------|------|----|
| <b>Total Weight Loss (%)</b>    | 50-850 °C         | 11.1 | 88.2 | 67.0 | 8.0  | -  |
| Moisture and very labile OM     | 50-175 °C         | 5.5  | 2.3  | 8.9  | 2.0  | -  |
| Intermediate OM-W1              | 175-400 °C        | 1.5  | 1.5  | 32.3 | 0.9  | -  |
| Recalcitrant OM-W2              | 400-625 °C        | 2.5  | 38.9 | 16.8 | 1.9  | -  |
| Stable OM + minerals-W3         | 625-850 °C        | 1.6  | 45.5 | 9.0  | 3.3  | -  |
| <b>Relative Weight Loss (%)</b> |                   |      |      |      |      |    |
| Moisture and very labile OM     | 50-175 °C         | 49.5 | 2.6  | 13.3 | 24.7 | -  |
| Intermediate OM-W1              | 175-400 °C        | 13.7 | 1.6  | 48.2 | 10.6 | -  |
| Recalcitrant OM-W2              | 400-625 °C        | 22.6 | 44.1 | 25.0 | 23.7 | -  |
| Stable OM + minerals-W3         | 625-850 °C        | 14.2 | 51.6 | 13.4 | 41.0 | -  |

**Supplementary Table S2.** Micronutrient and heavy metal concentrations of soils and barley plants at DAS 60.

| Soils  | C            | WB 5         | RA 5         | VA 5          | GC 5         | WB+GC 2.5    | RA+GC 2.5    | VA+GC 2.5    | VA+WB 2.5    | RA+WB 2.5     |
|--------|--------------|--------------|--------------|---------------|--------------|--------------|--------------|--------------|--------------|---------------|
| Al     | 33470 ± 1194 | 30438 ± 1070 | 30092 ± 1363 | 34580 ± 1919  | 34812 ± 510  | 32130 ± 2336 | 31173 ± 1103 | 32389 ± 601  | 32841 ± 1136 | 32511 ± 1251  |
| As     | 11.7 ± 1.8   | 9.8 ± 1.2    | 9.7 ± 1.7    | 13.1 ± 0.1    | 11.1 ± 1.0   | 9.3 ± 0.7    | 10.4 ± 2.1   | 8.1 ± 2.1    | 9.6 ± 1.8    | 9.8 ± 0.4     |
| B      | 5.8 ± 1.6    | 4.7 ± 0.3    | 6.4 ± 0.0    | 5.2 ± 0.2     | 7.5 ± 1.3    | 7.0 ± 0.6    | 4.9 ± 0.8    | 6.2 ± 1.6    | 5.7 ± 0.1    | 7.6 ± 0.7     |
| Ba     | 161.1 ± 10.4 | 143.2 ± 5.2  | 150.7 ± 4.1  | 163.2 ± 6.7   | 166.6 ± 11.4 | 156.1 ± 6.8  | 147.7 ± 1.4  | 155.6 ± 13.6 | 154.2 ± 3.0  | 158.6 ± 3.8   |
| Ca     | 12497 ± 514  | 11803 ± 335  | 11676 ± 96   | 12988 ± 351   | 14914 ± 551  | 13760 ± 121  | 12927 ± 483  | 13289 ± 1957 | 11967 ± 105  | 13070 ± 1400  |
| Cd     | 0.3 ± 0.0    | 0.1 ± 0.0    | 0.3 ± 0.0    | 0.2 ± 0.2     | 0.2 ± 0.1    | 0.2 ± 0.1    | 0.1 ± 0.1    | 0.2 ± 0.1    | 0.2 ± 0.1    | 0.2 ± 0.1     |
| Co     | 11.2 ± 0.8   | 10.1 ± 0.3   | 10.2 ± 0.1   | 10.9 ± 0.6    | 11.1 ± 0.1   | 10.5 ± 0.1   | 10.1 ± 0.3   | 10.9 ± 2.0   | 10.5 ± 0.2   | 10.4 ± 0.1    |
| Cr     | 42.7 ± 2.6   | 37.8 ± 1.0   | 39.3 ± 0.8   | 42.3 ± 1.9    | 43.0 ± 1.4   | 40.5 ± 1.3   | 38.7 ± 0.9   | 39.9 ± 1.0   | 40.4 ± 0.2   | 40.6 ± 2.5    |
| Cu     | 7.5 ± 0.6    | 6.9 ± 0.6    | 7.3 ± 0.2    | 8.2 ± 0.1     | 16.1 ± 1.2   | 10.4 ± 0.8   | 10.0 ± 0.4   | 10.8 ± 2.1   | 7.2 ± 0.0    | 7.7 ± 0.9     |
| Fe     | 30870 ± 1900 | 27416 ± 595  | 28461 ± 565  | 31000 ± 1954  | 30469 ± 619  | 29238 ± 596  | 27864 ± 626  | 28894 ± 1417 | 29320 ± 67   | 29549 ± 1689  |
| Li     | 16.8 ± 1.0   | 15.1 ± 0.0   | 15.4 ± 0.2   | 16.4 ± 0.8    | 16.5 ± 0.5   | 16.0 ± 0.4   | 15.2 ± 0.0   | 15.1 ± 0.2   | 15.9 ± 0.0   | 15.9 ± 0.8    |
| Mg     | 11517 ± 635  | 10303 ± 199  | 10605 ± 298  | 11573 ± 528   | 11632 ± 314  | 11049 ± 497  | 10556 ± 253  | 10942 ± 440  | 10959 ± 135  | 11040 ± 645   |
| Mn     | 534.5 ± 48.9 | 474.3 ± 1.9  | 525.7 ± 20.8 | 535.4 ± 27.1  | 536.1 ± 9.2  | 501.3 ± 25.0 | 503.3 ± 13.0 | 507.0 ± 34.5 | 499.2 ± 11.6 | 538.8 ± 17.2  |
| Mo     | 0.2 ± 0.1    | 0.3 ± 0.1    | 0.3 ± 0.1    | 0.2 ± 0.0     | 0.7 ± 0.3    | 0.1 ± 0.2    | 0.3 ± 0.0    | 0.2 ± 0.3    | 0.3 ± 0.0    | 0.2 ± 0.0     |
| Na     | 174 ± 11     | 163 ± 2      | 185 ± 15     | 237 ± 57      | 253 ± 25     | 209 ± 16     | 196 ± 1      | 149 ± 68     | 180 ± 5      | 182 ± 3       |
| Ni     | 6.2 ± 0.4    | 5.4 ± 0.1    | 6.0 ± 0.5    | 6.6 ± 0.1     | 7.5 ± 0.5    | 6.2 ± 0.5    | 6.5 ± 0.1    | 7.7 ± 1.4    | 6.0 ± 0.2    | 6.4 ± 0.7     |
| Pb     | 1.6 ± 0.5    | 3.1 ± 2.5    | 2.4 ± 0.9    | 2.9 ± 0.1     | 3.4 ± 0.5    | 2.5 ± 0.2    | 4.0 ± 2.0    | 2.4 ± 0.5    | 2.6 ± 0.7    | 5.4 ± 3.7     |
| S      | 227.8 ± 33.3 | 208.4 ± 13.0 | 325.2 ± 67.0 | 234.2 ± 10.5  | 396.0 ± 5.1  | 282.7 ± 15.9 | 307.4 ± 17.7 | 239.2 ± 27.3 | 228.2 ± 1.9  | 341.5 ± 140.8 |
| Sr     | 19.7 ± 0.7   | 18.6 ± 0.3   | 19.0 ± 0.8   | 22.3 ± 0.9    | 26.7 ± 1.1   | 23.0 ± 0.1   | 20.4 ± 0.0   | 35.5 ± 21.4  | 18.9 ± 0.3   | 20.0 ± 1.4    |
| V      | 63.5 ± 3.3   | 55.1 ± 1.8   | 57.4 ± 1.6   | 64.9 ± 5.2    | 63.7 ± 3.6   | 60.2 ± 2.3   | 61.8 ± 8.1   | 61.2 ± 5.9   | 59.5 ± 0.2   | 61.4 ± 4.0    |
| Zn     | 60.0 ± 2.8   | 53.3 ± 1.7   | 86.9 ± 4.2   | 92.4 ± 17.5   | 79.7 ± 10.7  | 88.1 ± 1.7   | 60.2 ± 2.5   | 58.1 ± 1.0   | 56.5 ± 1.2   | 57.7 ± 4.1    |
| Plants | C            | WB 5         | RA 5         | VA 5          | GC 5         | WB+GC 2.5    | RA+GC 2.5    | VA+GC 2.5    | VA+WB 2.5    | RA+WB 2.5     |
| Al     | 9.1 ± 2.4    | 45.5 ± 36.4  | 13.4 ± 9.1   | 195.1 ± 252.9 | 14.5 ± 1.5   | 51.6 ± 6.5   | 9.6 ± 1.6    | 12.4 ± 0.4   | 19.5 ± 9.9   | 13.4 ± 1.6    |
| As     | b.d.l        | b.d.l        | b.d.l        | b.d.l         | b.d.l        | b.d.l        | b.d.l        | b.d.l        | b.d.l        | b.d.l         |
| B      | 6.7 ± 0.5    | 5.8 ± 1.0    | 7.2 ± 1.0    | 4.6 ± 1.1     | 6.3 ± 0.7    | 6.7 ± 0.4    | 6.6 ± 0.8    | 5.7 ± 0.1    | 5.4 ± 0.8    | 16.0 ± 12.8   |
| Ba     | 6.2 ± 0.1    | 5.8 ± 0.2    | 5.7 ± 0.7    | 7.8 ± 2.5     | 4.8 ± 0.3    | 5.9 ± 0.2    | 4.9 ± 0.5    | 5.5 ± 0.6    | 6.3 ± 0.4    | 5.0 ± 0.4     |
| Ca     | 5582 ± 368   | 4903 ± 155   | 4809 ± 705   | 5698 ± 888    | 4669 ± 438   | 5019 ± 277   | 4308 ± 530   | 4929 ± 435   | 5388 ± 311   | 4023 ± 357    |
| Cd     | b.d.l        | b.d.l        | b.d.l        | b.d.l         | b.d.l        | b.d.l        | b.d.l        | b.d.l        | b.d.l        | b.d.l         |
| Co     | b.d.l        | b.d.l        | b.d.l        | b.d.l         | b.d.l        | b.d.l        | b.d.l        | b.d.l        | b.d.l        | b.d.l         |
| Cr     | 1.9 ± 1.4    | 1.7 ± 0.5    | 2.3 ± 0.7    | 2.3 ± 0.4     | 2.4 ± 0.6    | 2.5 ± 0.2    | 2.3 ± 0.5    | 2.5 ± 0.1    | 1.8 ± 0.4    | 1.1 ± 0.3     |
| Cu     | 5.2 ± 0.4    | 4.6 ± 0.3    | 5.1 ± 0.4    | 5.2 ± 0.1     | 5.0 ± 0.7    | 5.3 ± 0.2    | 4.8 ± 1.4    | 5.3 ± 0.7    | 5.2 ± 0.1    | 4.6 ± 0.1     |
| Fe     | 53.2 ± 12.1  | 97.3 ± 46.5  | 57.2 ± 16.9  | 288.3 ± 320.8 | 59.4 ± 10.2  | 103.7 ± 7.4  | 52.8 ± 8.1   | 57.1 ± 0.8   | 66.6 ± 8.3   | 49.1 ± 0.3    |
| Li     | b.d.l        | b.d.l        | b.d.l        | b.d.l         | b.d.l        | b.d.l        | b.d.l        | b.d.l        | b.d.l        | b.d.l         |
| Mg     | 3278 ± 100   | 3186 ± 72    | 3012 ± 189   | 3437 ± 143    | 2624 ± 113   | 2932 ± 77    | 2605 ± 204   | 3027 ± 22    | 3258 ± 85    | 2732 ± 132    |
| Mn     | 25.9 ± 2.0   | 25.8 ± 0.4   | 30.8 ± 4.0   | 28.7 ± 8.6    | 23.8 ± 0.5   | 24.9 ± 1.4   | 24.9 ± 2.4   | 22.2 ± 1.1   | 24.6 ± 0.4   | 23.4 ± 1.9    |
| Na     | 6303 ± 66    | 5127 ± 59    | 4208 ± 440   | 6242 ± 41     | 4863 ± 718   | 4742 ± 183   | 4362 ± 168   | 4969 ± 155   | 5696 ± 34    | 4681 ± 41     |
| Ni     | b.d.l        | 1.0 ± 0.1    | b.d.l        | b.d.l         | 1.4 ± 0.3    | b.d.l        | 1.4 ± 0.1    | 1.3 ± 0.0    | b.d.l        | b.d.l         |
| Pb     | b.d.l        | b.d.l        | b.d.l        | b.d.l         | b.d.l        | b.d.l        | 1.4 ± 0.1    | 1.0 ± 0.1    | b.d.l        | b.d.l         |
| S      | 3863 ± 217   | 3737 ± 319   | 3433 ± 360   | 4140 ± 100    | 2812 ± 58    | 3693 ± 147   | 2879 ± 189   | 3394 ± 160   | 4154 ± 68    | 2997 ± 202    |
| Sr     | 7.1 ± 0.3    | 6.3 ± 0.1    | 6.3 ± 0.8    | 7.3 ± 1.0     | 6.4 ± 0.6    | 6.6 ± 0.3    | 5.6 ± 0.6    | 6.4 ± 0.5    | 6.7 ± 0.4    | 5.3 ± 0.5     |
| V      | b.d.l        | b.d.l        | b.d.l        | b.d.l         | b.d.l        | b.d.l        | b.d.l        | b.d.l        | b.d.l        | b.d.l         |
| Zn     | 31.8 ± 0.8   | 21.6 ± 2.1   | 52.9 ± 8.4   | 55.6 ± 0.3    | 34.0 ± 3.0   | 47.3 ± 9.8   | 28.1 ± 2.6   | 27.5 ± 2.6   | 25.2 ± 1.1   | 21.9 ± 1.5    |

Values are given in mg kg<sup>-1</sup> (dry weight basis). Given error is standard error (*n* = 3)
